# Supplementary material for: Specific patterns of genetic diversity among aromatic rice varieties in Myanmar
Source: PubMed Central journal article supplement (PMC5520840; doi:10.1186/1939-8433-5-20), 2012-08-01
Supplement: 12284_2011_16_MOESM1_ESM.pdf [file 12284_2011_16_MOESM1_ESM.pdf]

Supplementary Table 1: List of the 80 varieties in the reference set assayed

| ID         | Variety name    | Country     | Isozyme group | SSR genotyping | Structure group | Aroma | Genotype 8 bp del. | Genotype 3 bp ins. | Haplotype |
|------------|-----------------|-------------|---------------|----------------|-----------------|-------|--------------------|--------------------|-----------|
| IRGC_32380 | ABRI            | Bhutan      | 5             | YES            | 5A              | u     | A                  | A                  | H2        |
| IRGC_12386 | ARC 10177       | India       | 2             | NO             | 2               | Na    | u                  | u                  | ns        |
| IRGC_12485 | ARC 10497       | India       | 5             | YES            | 5A              | u     | A                  | A                  | H4        |
| IRGC_42469 | ARC 13829       | India       | 5             | YES            | 5A              | u     | A                  | A                  | H3        |
| IRGC_12331 | ARC 7229        | India       | 5             | NO             | m               | Na    | u                  | u                  | H3        |
| IRGC_6267  | ASD 1           | India       | 1             | NO             | 1               | Na    | u                  | u                  | ns        |
| IRGC_7017  | AUS 143         | India       | 2             | YES            | 2               | Na    | u                  | u                  | ns        |
| IRGC_328   | AZUCENA         | Philippines | 6             | NO             | 6               | Ar    | P                  | A                  | ns        |
| IRGC_27509 | BARAN BORO      | Bangladesh  | 2             | NO             | 2               | Na    | u                  | u                  | ns        |
| IRGC_27798 | BASMATI 1       | Pakistan    | 5             | YES            | 5A              | Ar    | P                  | A                  | H1        |
| IRGC_53637 | BASMATI 217     | India       | 5             | YES            | 5A              | Ar    | P                  | A                  | H1        |
| IRGC_6426  | BASMATI 370     | Pakistan    | 5             | NO             | 5A              | Ar    | P                  | A                  | H1        |
| IRGC_58881 | BASMATI LAMO    | Nepal       | 5             | YES            | 5A              | Ar    | P                  | A                  | H1        |
| IRGC_40275 | BLACK GORA      | India       | 2             | NO             | 2               | Na    | u                  | u                  | ns        |
| IRGC_50448 | CANELA DE FERRO | Brazil      | 6             | NO             | 6               | Na    | u                  | u                  | ns        |
| IRGC_27869 | CHAHORA 144     | Pakistan    | 5             | YES            | 5A              | Ar    | P                  | A                  | H1        |
| IRGC_58930 | CHHOTE DHAN     | Nepal       | 5             | YES            | m               | Na    | A                  | A                  | H7        |
| IRGC_17052 | CHUAN 4         | Taiwan      | 6             | NO             | 6               | Na    | u                  | u                  | ns        |
| IRGC_43372 | CICIH BETON     | Indonesia   | 6             | NO             | 6               | Na    | u                  | u                  | ns        |
| IRGC_10658 | CUBA 65         | Cuba        | 6             | NO             | 6               | Na    | u                  | u                  | ns        |
| IRGC_5857  | DA 13           | Bangladesh  | 5             | YES            | 5A              | Ar    | P                  | A                  | H1        |
| IRGC_12880 | DOM SOFID       | Iran        | 5             | YES            | 5A              | Ar    | P                  | A                  | H1        |
| IRGC_12881 | DOM ZARD        | Iran        | 5             | YES            | 5A              | Ar    | P                  | A                  | H1        |
| IRGC_32292 | DOMSIAH         | Iran        | 5             | YES            | 5A              | Ar    | P                  | A                  | H1        |
| IRGC_26011 | DOURADO PRECOCE | Brazil      | 6             | NO             | 6               | Na    | u                  | u                  | ns        |
| IRGC_10984 | FANDRAPOTSY 104 | Madagascar  | 1             | NO             | m               | Na    | u                  | u                  | ns        |
| IRGC_39261 | FIROOZ          | Iran        | 5             | YES            | 5A              | Na    | A                  | A                  | H2        |
| IRGC_32303 | GHARIB          | Iran        | 5             | YES            | m               | Ar    | P                  | A                  | H1        |
| IRGC_43397 | GOTAK GATIK     | Indonesia   | 6             | NO             | 6               | Na    | u                  | u                  | ns        |
| IRGC_33085 | GWA NGASEIN     | Myanmar     | 1             | NO             | 1               | Na    | u                  | u                  | ns        |
| IRGC_4122  | IGUAPE CATETO   | Brazil      | 6             | NO             | 6               | Na    | u                  | u                  | ns        |

| ID          | Variety name          | Country        | Isozyme group | SSR genotyping | Structure group | Aroma | Genotype 8 bp del. | Genotype 3 bp ins. | Haplotype |
|-------------|-----------------------|----------------|---------------|----------------|-----------------|-------|--------------------|--------------------|-----------|
| IRGC_33130  | INDANE                | Myanmar        | 6             | NO             | 6               | Na    | u                  | u                  | ns        |
| CIRAD_8351  | IR 64                 | Philippines    | 1             | NO             | 1               | Na    | A                  | A                  | ns        |
| IRGC_10320  | IR 8                  | Philippines    | 1             | NO             | 1               | Na    | u                  | u                  | ns        |
| IRGC_28508  | IRAT 13               | Côte d'Ivoire  | 6             | NO             | 6               | Na    | u                  | u                  | ns        |
| IRGC_27516  | JAGLI BORO            | Bangladesh     | 2             | NO             | 2               | Na    | u                  | u                  | ns        |
| IRGC_9091   | JC 1                  | India          | 5             | YES            | 5A              | Ar    | P                  | A                  | H1        |
| IRGC_9060   | JC 101                | India          | 5             | YES            | 5A              | u     | P                  | A                  | H1        |
| IRGC_9070   | JC 149                | India          | 5             | YES            | 5A              | u     | P                  | A                  | H1        |
| IRGC_27967  | JHONA 26              | Pakistan       | 2             | NO             | 2               | Na    | u                  | u                  | ns        |
| IRGC_6618   | KARKATI 87            | Bangladesh     | 1             | NO             | 1               | Na    | u                  | u                  | ns        |
| IRGC_117617 | KASALATH              | India          | 2             | NO             | 2               | Na    | u                  | u                  | ns        |
| IRGC_33188  | KAUKKYI ANI           | Myanmar        | 5             | NO             | 5B              | u     | u                  | u                  | ns        |
| IRGC_27748  | KHAO DAWK MALI 105    | Thailand       | 1             | NO             | 1               | Ar    | P                  | A                  | H1        |
| IRGC_23423  | KHAO KAP XANG         | Laos           | 6             | NO             | 6               | Na    | u                  | u                  | ns        |
| IRGC_23364  | KINANDANG PATONG      | Philippines    | 6             | NO             | 6               | Na    | u                  | u                  | ns        |
| CIRAD_5109  | KIRIMINY 1133         | Madagascar     | 5             | YES            | 5A              | Ar    | A                  | A                  | H8        |
| CIRAD_5110  | KIRIMINY DE 4 MOIS    | Madagascar     | 5             | YES            | 5A              | Ar    | A                  | A                  | H8        |
| CIRAD_5112  | KIRIMINY TYPE BENGALY | Madagascar     | 5             | YES            | 5A              | Ar    | A                  | A                  | H7        |
| IRGC_11010  | MAINTIMOLOTSY 1226    | Madagascar     | 6             | NO             | 6               | Na    | u                  | u                  | ns        |
| IRGC_6087   | MAKALIOKA 34          | Madagascar     | 1             | NO             | 1               | Na    | u                  | u                  | ns        |
| IRGC_8182   | MALAGKIT PIRURUTONG   | Philippines    | 6             | NO             | 6               | Na    | u                  | u                  | ns        |
| IRGC_23973  | MANA MURI             | Nepal          | 5             | YES            | 5A              | u     | A                  | A                  | H4        |
| IRGC_12883  | MEHR                  | Iran           | 5             | YES            | 5A              | u     | P                  | A                  | H1        |
| IRGC_12048  | MOROBEREKAN           | Guinea-Conakry | 6             | NO             | 6               | Na    | u                  | u                  | ns        |
| IRGC_6298   | N 12                  | India          | 5             | YES            | 5A              | Ar    | P                  | A                  | H1        |
| IRGC_6264   | N 22                  | India          | 2             | NO             | 2               | Na    | u                  | u                  | ns        |
| IRGC_11462  | NAM SA GUI 19         | Thailand       | 1             | NO             | 1               | Na    | u                  | u                  | ns        |
| IRGC_191    | NHTA 10               | India          | 6             | NO             | 6               | Na    | u                  | u                  | ns        |
| IRGC_12731  | NIPPONBARE            | Japan          | 6             | NO             | 6               | Na    | u                  | u                  | H15       |
| IRGC_22710  | NONA BOKRA            | India          | 1             | NO             | 1               | Na    | u                  | u                  | ns        |
| IRGC_38690  | NPE 253               | Pakistan       | 6             | NO             | 6               | Na    | u                  | u                  | ns        |
| IRGC_5999   | PANKHARI 203          | India          | 5             | YES            | 5A              | Ar    | P                  | A                  | H1        |
| IRGC_8266   | PEH PI NUO            | China          | 6             | NO             | 6               | Na    | u                  | u                  | ns        |

| ID         | Variety name      | Country       | Isozyme group | SSR genotyping | Structure group | Aroma | Genotype 8 bp del. | Genotype 3 bp ins. | Haplotype |
|------------|-------------------|---------------|---------------|----------------|-----------------|-------|--------------------|--------------------|-----------|
| IRGC_32571 | PETA              | Indonesia     | 1             | NO             | 1               | Na    | u                  | u                  | ns        |
| IRGC_32399 | PHUDUGEY          | Bhutan        | 5             | YES            | 5A              | Na    | A                  | A                  | H4        |
| IRGC_8948  | POKKALI           | Sri Lanka     | 1             | NO             | 1               | Na    | u                  | u                  | ns        |
| IRGC_6386  | PTB 25            | India         | 1             | NO             | 1               | Na    | u                  | u                  | ns        |
| IRGC_8952  | RATHUWEE          | Sri Lanka     | 1             | NO             | 1               | Na    | u                  | u                  | ns        |
| IRGC_8197  | SHAI KUH          | China         | 1             | NO             | 1               | Na    | u                  | u                  | ns        |
| IRGC_5418  | SINTANE DIOFOR    | Burkina Fasso | 1             | NO             | m               | Na    | u                  | u                  | ns        |
| IRGC_8256  | SURJAMKUHI        | India         | 2             | NO             | 2               | Na    | u                  | u                  | ns        |
| IRGC_46768 | T 26              | India         | 5             | YES            | m               | u     | A                  | A                  | H7        |
| IRGC_105   | TAICHUNG NATIVE 1 | Taiwan        | 1             | NO             | 1               | Na    | u                  | u                  | ns        |
| IRGC_47743 | TAINUNG 67        | Taiwan        | 1             | NO             | 1               | Na    | u                  | u                  | ns        |
| IRGC_32362 | TCHAMPA           | India         | 5             | YES            | 5A              | Na    | A                  | A                  | H2        |
| IRGC_81093 | TEQUING           | China         | 1             | NO             | 1               | Na    | u                  | u                  | ns        |
| IRGC_32576 | TETEP             | Vietnam       | 1             | NO             | 1               | Na    | u                  | u                  | ns        |
| IRGC_43675 | TREMBESE          | Indonesia     | 6             | NO             | 6               | Na    | u                  | u                  | ns        |
| IRGC_33888 | YELAIK MEEDON     | Myanmar       | 5             | NO             | 5B              | u     | A                  | A                  | H1        |

u = unknown; Ar= aromatic; NA= non-aromatic; Genotype: 8bp del. = 8 bp deletion in exon 7 in comparison with Nipponbare sequence; 3 bp ins. = 3 bp insertion in exon 13 in comparison with Nipponbare sequence; A= absent; P= present; Haplotype: ns= not sequenced

Supplementary Table 2: List of the primers used to amplify segments of the *BADH2* gene

| Name           | Forward primer        | Reverse primer           | Annealing temperature | Segment amplified | Source                 |
|----------------|-----------------------|--------------------------|-----------------------|-------------------|------------------------|
| <b>INS3</b>    | GTCCTGTTCAATCTTGCAGC  | CTTGATGCAACCATGTCATA     | 55°C                  | E13               | Designed by us         |
| <b>DEL8</b>    | TGCTCCTTTGTCATCACACC  | TTTCCACCAAGTTCCAGTGA     | 55°C                  | E7                | Vanavichit et al. 2008 |
| <b>BADH 1</b>  | CGAAGTCCGTACCAACTGC   | GGCCGTGAGCCATATACTACT    | 55°C                  | 5'U-I2            | Kovach et al. 2009     |
| <b>BADH 2</b>  | AGTTGGAAGCATGGCTGATT  | CCAGCTCAGATTTCCCTCTCG    | 55°C                  | I2-E3             | Kovach et al. 2009     |
| <b>BADH 3</b>  | GATTGTGGGAAGCCTCTTGA  | CGATAGGCTCTTTCCGAAGAT    | 55°C                  | E3-E4             | Kovach et al. 2009     |
| <b>BADH 4</b>  | ATCTTCGGAAAGAGCCTATCG | AGGAGCTACCTTCCATGTTGC    | 55°C                  | E4-E5             | Kovach et al. 2009     |
| <b>BADH 5</b>  | CTATCCTCTCTGATGGCAAC  | TGGCTACTAGAATGATGCTCAAAG | 55°C                  | E5-I6             | Kovach et al. 2009     |
| <b>BADH 6</b>  | TGCTCCTTTGTCATCACACC  | GGTCCAAAAGCAACCAAAGA     | 55°C                  | E7-E8             | Vanavichit et al. 2008 |
| <b>BADH 7</b>  | GCCATGCCAACTGAGTAAAG  | CAATTTTATTCGCTCTGTGC     | 55°C                  | E8-E9             | Vanavichit et al. 2008 |
| <b>BADH 8</b>  | TGCAACATCGCGTCTTATTC  | GCAACTAGCAAGAGCATAACACC  | 55°C                  | E9-E10            | Vanavichit et al. 2008 |
| <b>BADH 9</b>  | GCCCGTTGTTAGTGAAGGAC  | GTACCATCCCCACGGCTCAT     | 55°C                  | E10-I13           | Vanavichit et al. 2008 |
| <b>BADH 10</b> | ACCTGACATCATGCCTTTGG  | CCGGTCATCAGCTAACTTCC     | 55°C                  | E14 -3'U          | Vanavichit et al. 2008 |
| <b>BADH 11</b> | GCCCGTTGTTAGTGAAGGAC  | CAATGGCTTCTTCTTCAGTGC    | 55°C                  | I11-E12           | Designed by us         |
| <b>BADH 12</b> | CGAGCGATGCCAGAGATTA   | CGTCACTTGCTTGACGCTTA     | 55°C                  | E13-E14           | Designed by us         |

E = exon; I = intron; U= untranslated region

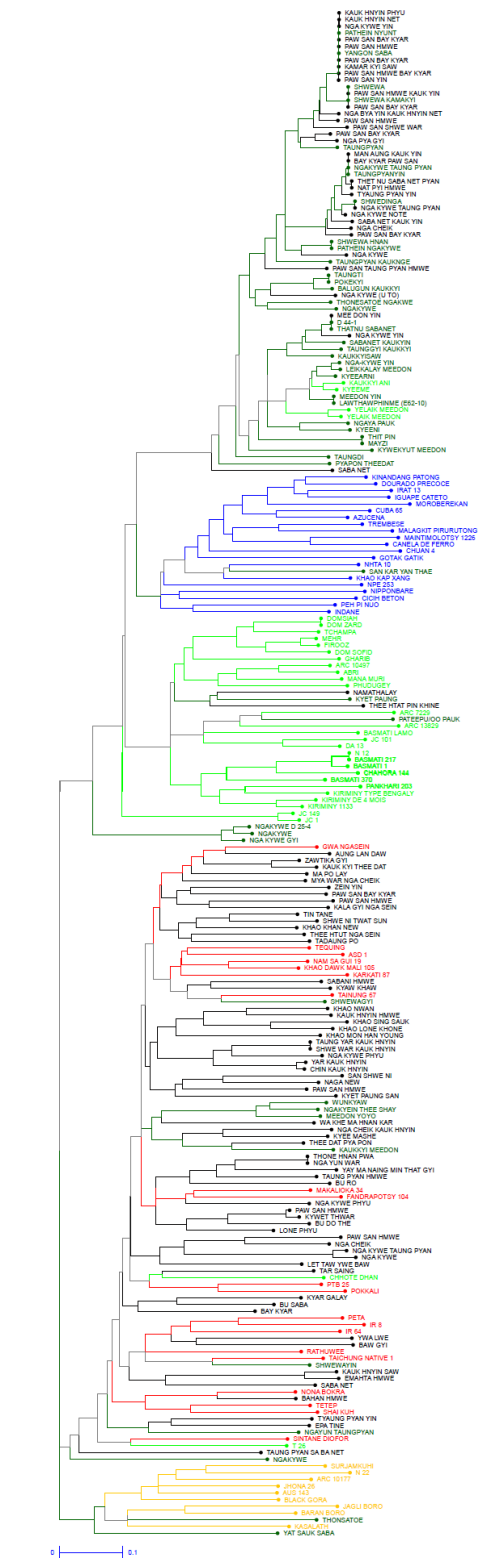

Supplementary Figure S1: NJ tree representing the relative position of Myanmar accessions and the reference set.

Colors according to enzymatic groups: 1 = indica accessions in red, 2=aus/boro in yellow, 5=sadri/basmati in light green (reference set) or dark green (Myanmar accessions based on data from Khush et al (2003)=); 6=japonica in blue; unknown group in black.

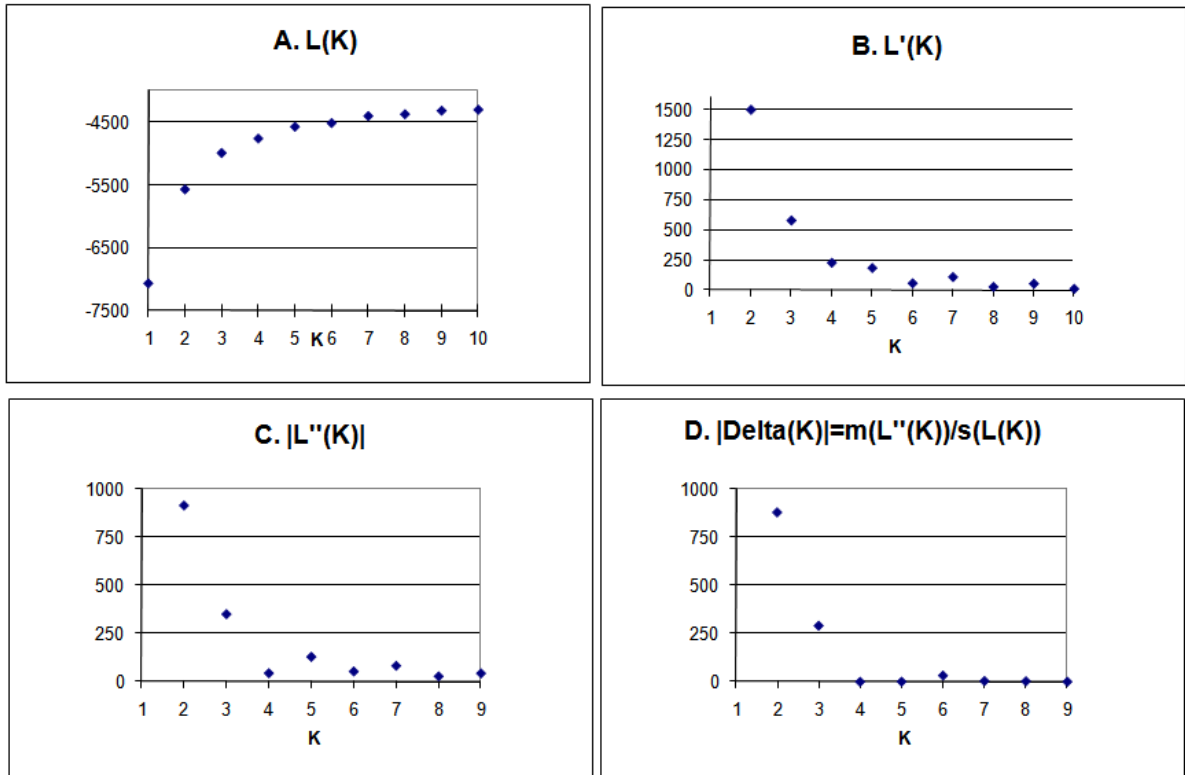

Supplementary Figure S2: Evolution of the criteria that enabled detection of the likely number of subpopulations (K) in the 227 accessions using 19 SSR markers for K values varying from 1 to 10.

A:  $L(k)$  = mean of the likelihood distribution  $\text{Ln}P(D)$  over 10 runs for each K value. B:  $L'(K)$  = rate of change of the likelihood function with respect to K. C:  $|L''(K)|$  = second order rate of change of L(K) with respect to K; Delta(k) = mean  $|L''(K)|$ /standard deviation (L(K)).
