# Supplementary material for: Specific patterns of genetic diversity among aromatic rice varieties in Myanmar
Source: PubMed Central journal article supplement (PMC5520840; doi:10.1186/1939-8433-5-20), 2012-08-01

2.A

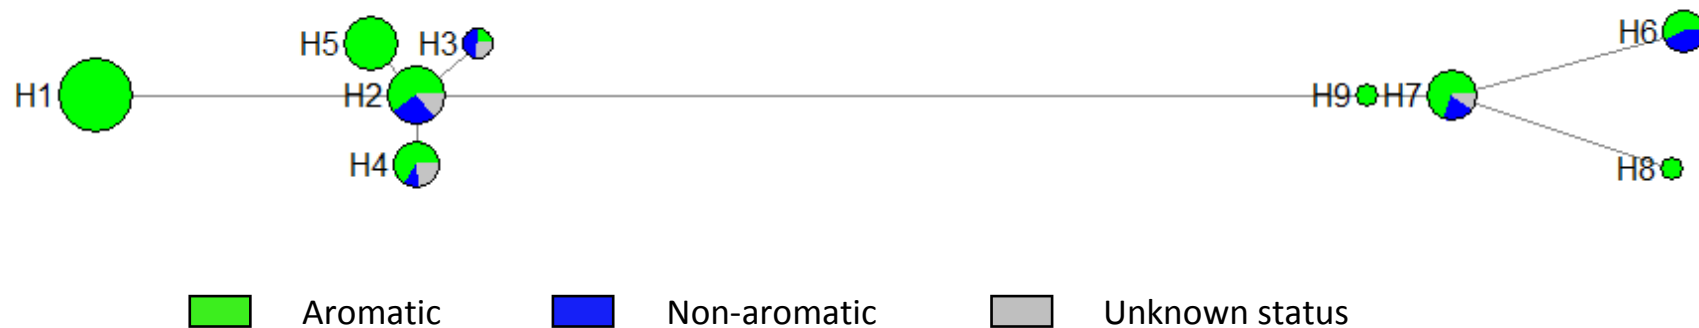

2.B

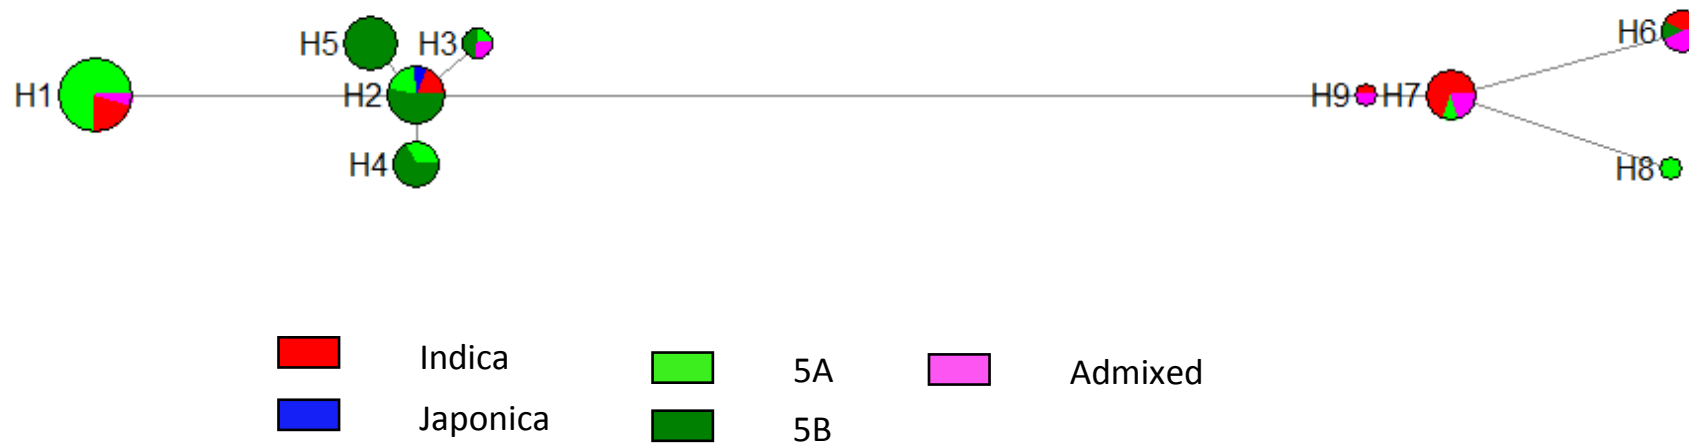

Supplement: 12284_2011_16_MOESM3_ESM.pdf [file 12284_2011_16_MOESM3_ESM.pdf]
